# Supplementary material for: Initial parasitic behaviour of the temporary social parasitic ant Polyrhachis lamellidens can be induced by host-like cuticles in laboratory environment
Source: Oxford University Press journal article supplement (doi:10.1242/bio.058956), 2022-02-24
Supplement: bio058956supp.pdf [file bio058956supp.pdf]

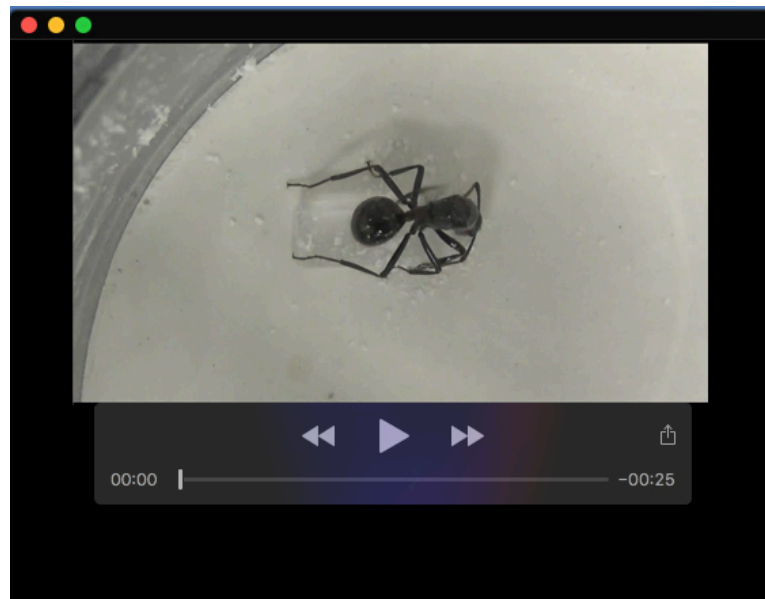

**Movie 1. Rubbing behaviour of a newly mated *P. lamellidens* queen towards a glass bead coated with chitin and host CCs.**

A newly mated *P. lamellidens* queen and a glass bead coated with chitin and host CCs were placed into a plaster-spread plastic arena. After 1 minute, the movie was taken.
